# Supplementary material for: Confined surface-enhanced indole cation-radical cyclization studied by mass spectrometry
Source: Royal Society of Chemistry journal article supplement (doi:10.1039/d2an01719a), 2022-12-12
Supplement: d2an01719a1.pdf [file d2an01719a1.pdf]

## Supporting Information

### **Confined Surface-Enhanced Indole Cation-Radical Cyclization by Mass Spectrometry**

Jianghui Sun, Hongwei Tan, Yixuan Gao, Jingjing Li, Juanjuan Wei, Shengxi Zhang, Jin Ouyang, Na Na\*

Key Laboratory of Radiopharmaceuticals, Ministry of Education, College of Chemistry, Beijing Normal University, Beijing 100875, China.

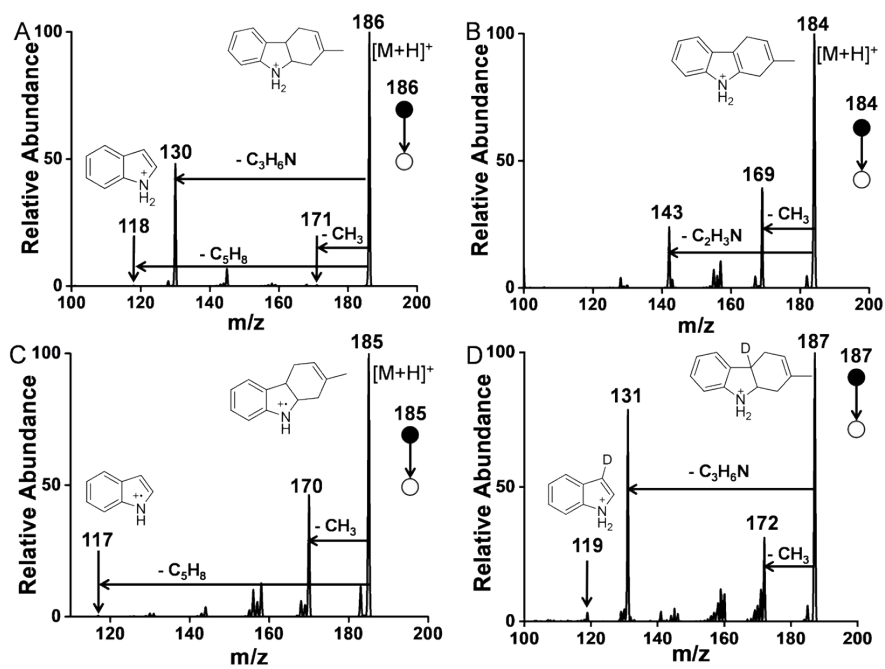

**Figure S1.** CID experiments to examine intermediates and product. (A) MS<sup>2</sup> CID of intermediate ion [3+H]<sup>+</sup> at m/z 186. (B) MS<sup>2</sup> CID of product ion [4+H]<sup>+</sup> at m/z 184. (C) MS<sup>2</sup> CID of intermediate ion 3<sup>+</sup> ions at m/z 185. (D) MS<sup>2</sup> CID of [3-d<sub>1</sub>+H]<sup>+</sup> at m/z 187.

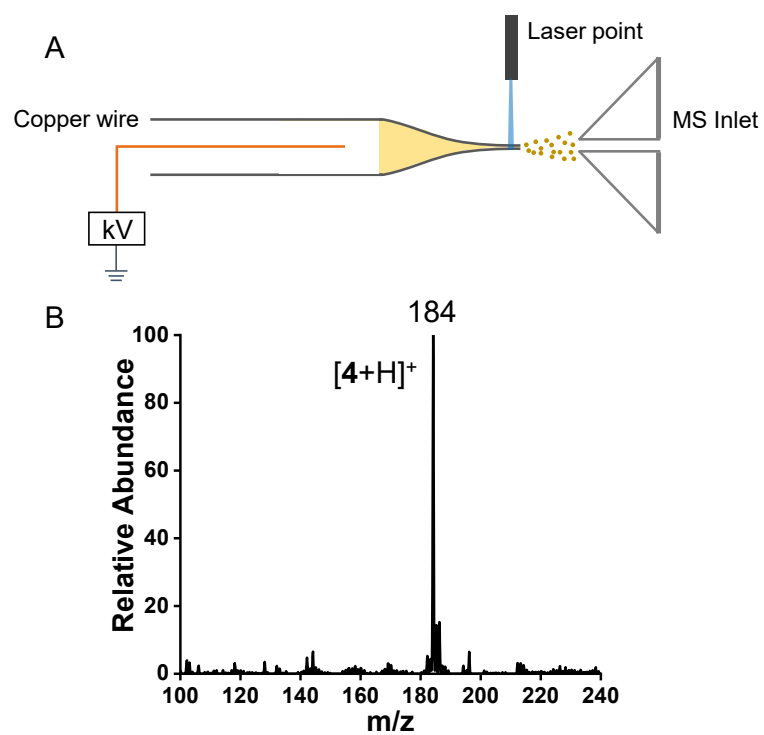

**Figure S2.** (A) Schematic diagram of inductive nESI. (B) Mass spectrometric analysis of Ru-catalyzed indole cation-radical cyclization in confined nanopipette using inductive nESI after reacting for 20 s.

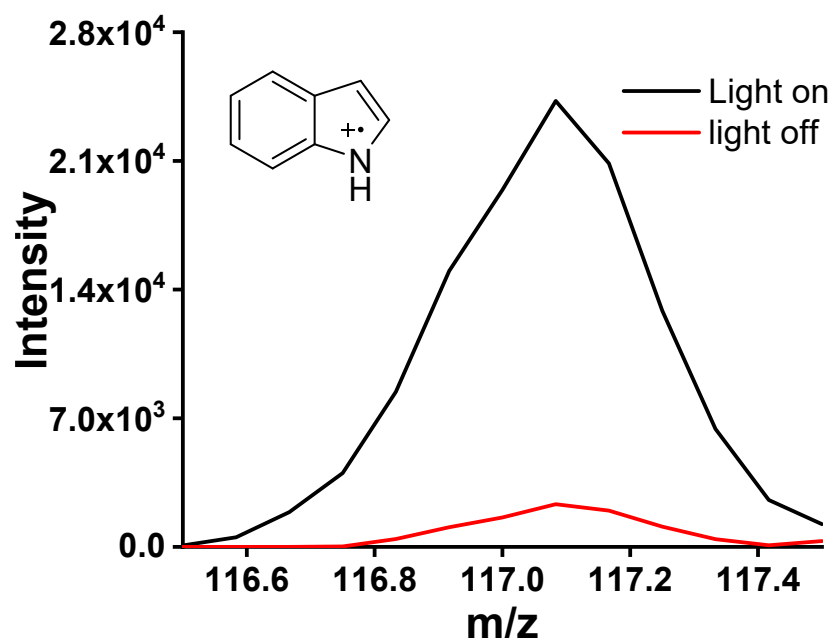

**Figure S3.** The formation of the cationic radical  $1^{\bullet+}$ .

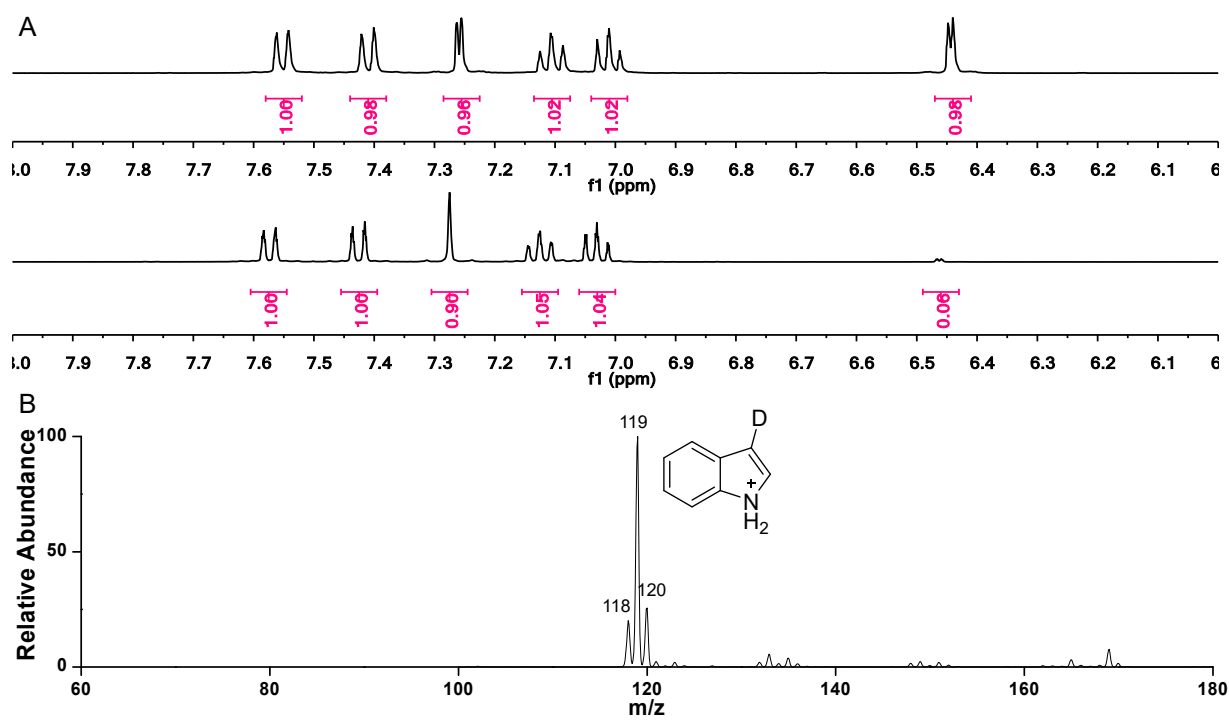

**Figure S4.** (A) <sup>1</sup>H NMR chart of indole (a) and indole-*d*<sub>1</sub> (b). (50% D<sub>2</sub>O/CD<sub>3</sub>OD, 400 MHz). (B) The mass spectra of indole-*d*<sub>1</sub>.

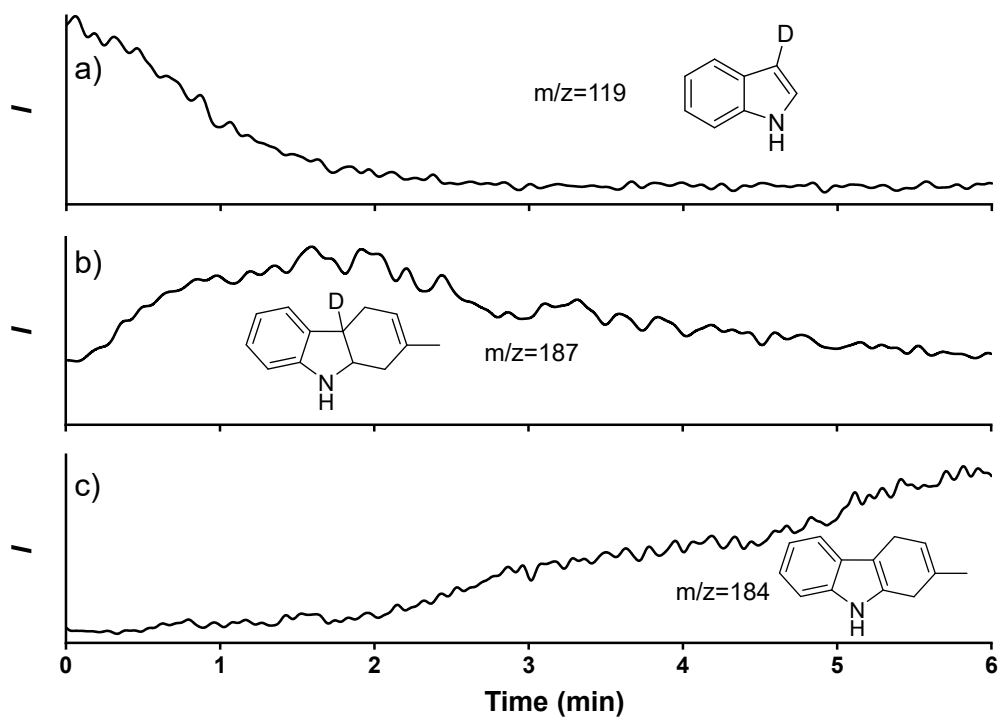

**Figure S5.** EICs of  $[1-d_1+H]^+$  at m/z 118 (a),  $[3-d_1+H]^+$  at m/z 187 (b), and  $[4+H]^+$  at m/z 184 (c). I=Intensity

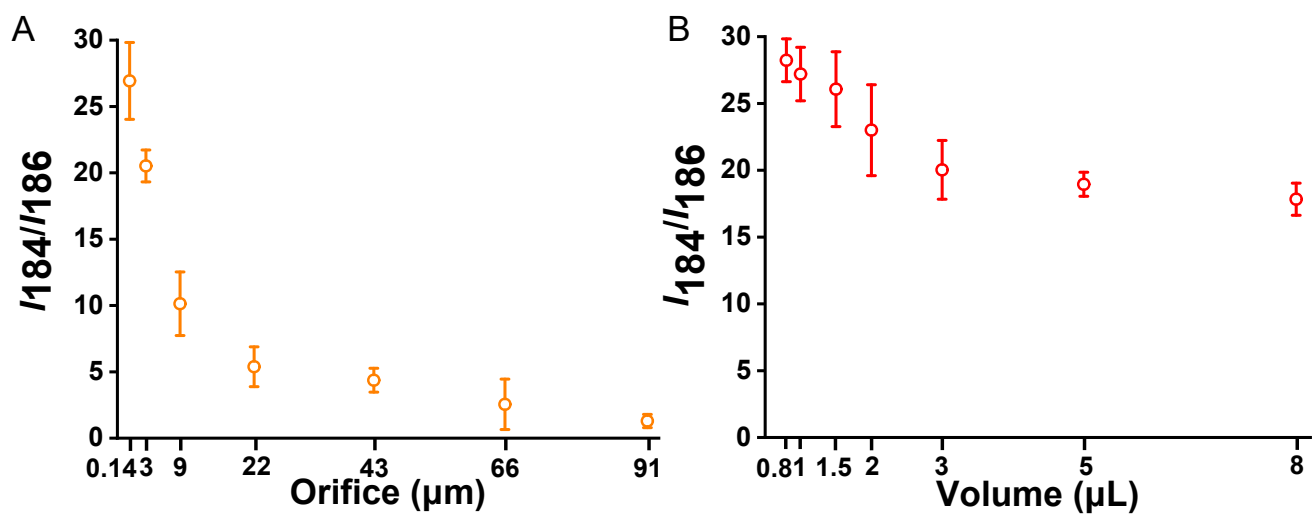

**Figure S6.** Optimization of the orifice size of the confined nanopipette (A) and the volume of the reaction system (B).

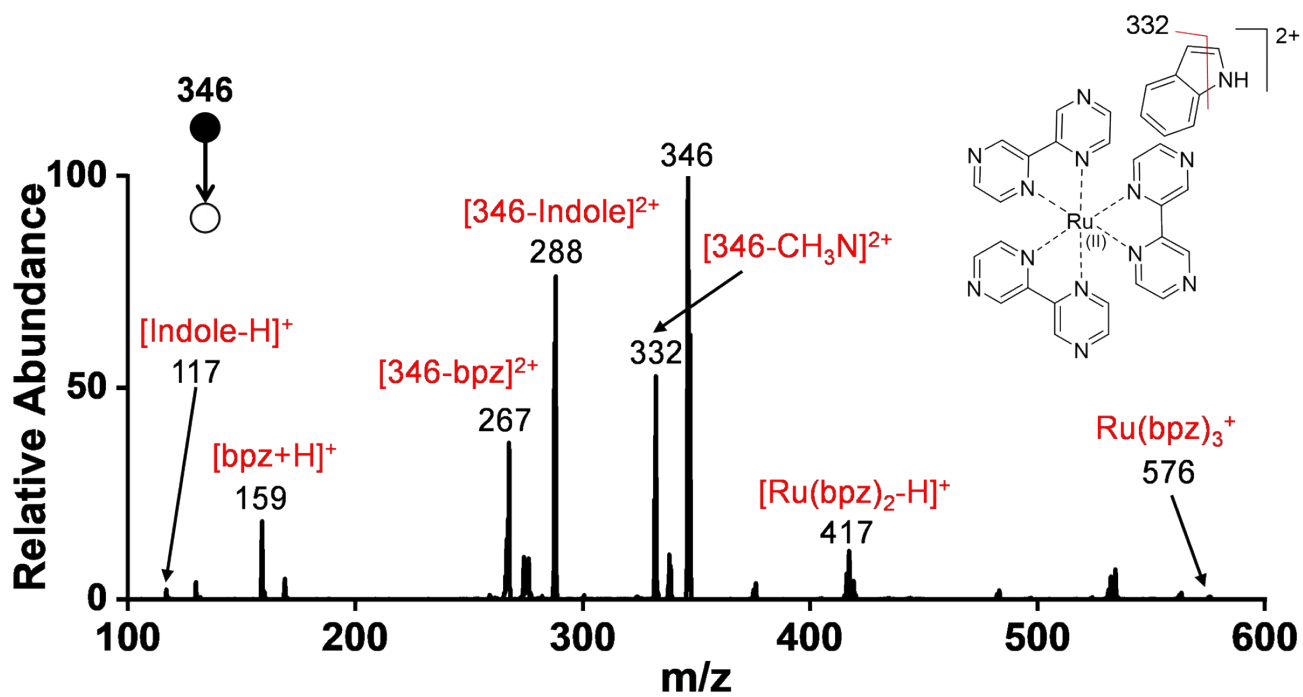

Figure S7. CID experiment to examine complex  $[Ru(bpz)_3+1]^{2+}$  at  $m/z$  346.



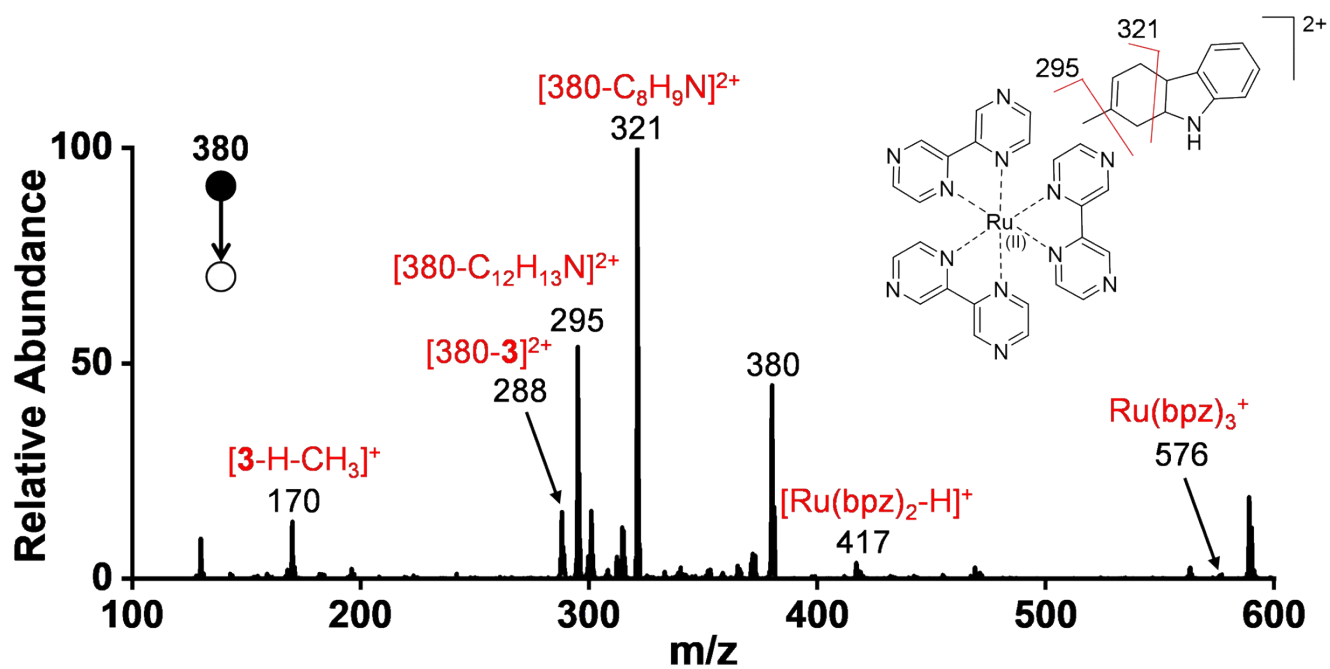

Figure S8. CID experiment to examine complex  $[\text{Ru}(\text{bpz})_3+3]^{2+}$  at  $m/z$  380.

**Table S1.** The possible transformations of the electronic states of ruthenium, indole and intermediate **3**

|             | [Ru(bpz) <sub>3</sub> ] <sup>2+</sup> | [Ru(bpz) <sub>3</sub> ] <sup>+</sup> | Reactant <b>1</b> | Cationic radical <b>1</b> <sup>•+</sup> | Intermediate <b>3</b> | Cationic radical <b>3</b> <sup>•+</sup> |
|-------------|---------------------------------------|--------------------------------------|-------------------|-----------------------------------------|-----------------------|-----------------------------------------|
| Energy (Ha) | -1675.75613                           | -1676.13348                          | -363.82202        | -363.54316                              | -557.59426            | -557.33829                              |

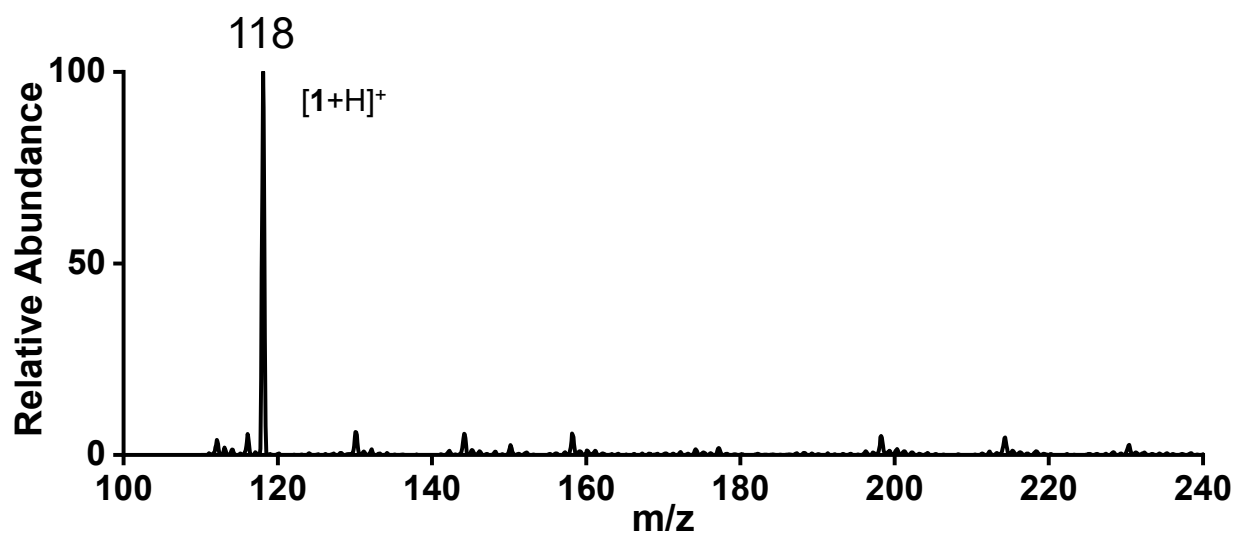

**Figure S9.** Mass spectrometric analysis of Ru-catalyzed indole cation-radical cyclization in silanized nanopipette after 20 s.

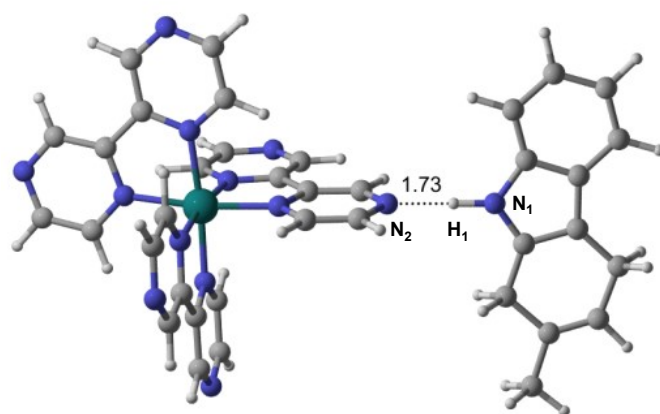

**Figure S10.** Calculated structure of complex  $[\text{Ru}(\text{bpz})_3+3]^{2+}$ .
